# Supplementary material for: Effects of Sex and 17 β-Estradiol on Cardiac Fibroblast Morphology and Signaling Activities In Vitro
Source: MDPI journal article supplement (doi:10.3390/cells10102564), 2021-09-28
Supplement: s1 [file s1]

**Table S1.** Outline of four rounds of CycIF including antibodies, used, Alexa Flour conjugation, dilution ratio, and micro-scope settings (Light, Exposure, and Gain).

| CycIF Round | Antibody                      | Manufacture                  | Alexa Flour  | Dilution | Light | Exposure | Gain |
|-------------|-------------------------------|------------------------------|--------------|----------|-------|----------|------|
| 1           | Anti-p-p38 (E-1)              | Santa Cruz (sc-166182 AF594) | 594 (Tx-Red) | 1:25     | 65    | 703      | 13.3 |
|             | Anti-NFATc4 (B-2)             | Santa Cruz (sc-271597 AF488) | 488 (GFP)    | 1:30     | 61    | 462      | 12.2 |
|             | Anti-Smad3 (38-Q)             | Santa Cruz (sc-101154)       | *            | 1:25     | 52    | 755      | 15.2 |
| 2           | Anti-MRTF-A (G-8)             | Santa Cruz (sc-390324 AF546) | 546 (RFP)    | 1:25     | 52    | 582      | 6.6  |
|             | Anti- Rock-1 (G-6)            | Santa Cruz (sc-17794 AF647)  | 674 (Cy5)    | 1:30     | 61    | 586      | 14.3 |
|             | Anti-NFκB p50 (E-10)          | Santa Cruz (sc-8414)         | *            | 1:25     | 58    | 908      | 15.4 |
| 3           | Anti-p-JNK (G-7)              | Santa Cruz (sc-6254 AF546)   | 546 (RFP)    | 1:50     | 42    | 151      | 7.4  |
|             | Anti-p-Akt1/2/3 (C-11)        | Santa Cruz (sc-514032 AF647) | 647 (Cy5)    | 1:30     | 61    | 586      | 14.3 |
|             | Anti-ASMA                     | abcam (ab5694)               | *            | 1:250    | 61    | 911      | 14.4 |
| 4           | Anti-p-ERK (E-4)              | Santa Cruz (sc-7383 AF488)   | 488 (GFP)    | 1:30     | 58    | 391      | 14   |
|             | Texas Red®-X phalloidin       | Fisher (T7471)               | 594 (Tx-Red) | 1:40     | 65    | 676      | 17.1 |
|             | Anti-p-FAK (Tyr397)           | invitrogen (700255)          | *            | 1:250    | 58    | 1140     | 15.4 |
| 1 - 4       | *mouse-anti-rabbit IgG PE-Cy7 | Santa Cruz (sc-516721)       | 750 (Cy7)    | 1:100    | -     | -        | -    |
|             | Hoechst 33342                 | Fisher (H3570)               | DAPI         | 1:1000   | 35    | 51       | 9    |

**Table S2.** All p-values from two-way ANOVA analysis. Significance at  $\alpha=0.05$  are bolded and denoted with an \*. .

|                    | $P_{E2}$     | $P_{sex}$     | $P_{sex*E2}$ |
|--------------------|--------------|---------------|--------------|
| Cell Density       | 0.87         | 0.58          | 0.15         |
| Cell Area          | 0.89         | 0.81          | 0.43         |
| Cell Elongation    | 0.62         | 0.67          | 0.07         |
| Nucleus Area       | 0.45         | 0.53          | 0.43         |
| Nucleus Elongation | 0.72         | 0.97          | 0.49         |
| α-SMA              | 0.94         | 0.57          | 0.16         |
| F-Actin            | 0.92         | 0.97          | 0.49         |
| P-ERK              | 0.49         | 0.94          | <b>0.02*</b> |
| P-p38              | 0.37         | <b>0.04*</b>  | 0.43         |
| ROCK1              | 0.06         | <b>0.048*</b> | 0.47         |
| P-FAK              | <b>0.01*</b> | 0.53          | 0.34         |
| p-JNK              | 0.17         | 0.07          | 0.394        |
| p-AKT              | 0.24         | 0.86          | 0.06         |
| NFAT               | 0.52         | <b>0.01*</b>  | 0.62         |
| NF-κB              | 0.63         | 0.50          | 0.30         |
| SMAD3              | 0.99         | 0.38          | 0.20         |
| MRTF               | 0.43         | 0.53          | 0.31         |
